# Supplementary material for: Natural durability of timber species exposed to xylophagous fungi in southern Durango, Mexico
Source: PeerJ. 2023 Mar 10;11:e14541. doi: 10.7717/peerj.14541 (PMC10010173; doi:10.7717/peerj.14541)
Supplement: Supplemental Information 1 [file peerj-11-14541-s001.xlsx]

## Sheet: Coniophora puetana
fungi_species	tree_number	wood_species	sample_number	start_dry_weight	end_dry_weight	%_leaching	mass_loss%	mass_loss_with_lixiviation
C. puteana	2	encino	E25-1	1.3763	1.125	2.49	18.2591	15.7691
C. puteana	1	encino	E13-2	1.2172	1.1329	2.49	6.92573	4.43573
C. puteana	2	encino	E24-3	1.1983	0.9334	2.49	22.1063	19.6163
C. puteana	3	encino	E32-4	1.2223	0.9557	2.49	21.8113	19.3213
C. puteana	1	encino	E13-5	1.1608	0.9991	2.49	13.93	11.44
C. puteana	2	encino	E24-6	1.1829	0.9417	2.49	20.3906	17.9006
C. puteana	1	encino	E14_12	1.3272	1.0182	2.49	23.2821	20.7921
C. puteana	3	encino	E32-8	1.2278	1.0127	2.49	17.5191	15.0291
C. puteana	2	encino	E25-9	1.4	0.8195	2.49	41.4643	38.9743
C. puteana	1	encino	E14-10	1.2971	1.1427	2.49	11.9035	9.41348
C. puteana	3	encino	E32-13	1.2764	1.0407	2.49	18.466	15.976
C. puteana	3	encino	E35_14	1.3825	1.1884	2.49	14.0398	11.5498
C. puteana	2	encino	E24_16	1.2819	1.1026	2.49	13.9871	11.4971
C. puteana	1	encino	E11_17	1.3933	1.0514	2.49	24.5389	22.0489
C. puteana	2	encino	E24_18	1.371	1.0124	2.49	26.1561	23.6661
C. puteana	1	alnus	AL1.2_21	0.6854	0.613	4.77	10.5632	5.79317
C. puteana	3	alnus	AL3_22	0.772	0.5757	4.77	25.4275	20.6575
C. puteana	1	alnus	AL1.8_23	0.646	0.568	4.77	12.0743	7.3043
C. puteana	2	alnus	AL2.1_24	0.446	0.4202	4.77	5.78475	1.01475
C. puteana	2	alnus	AL2.1_25	0.5547	0.1431	4.77	74.2023	69.4323
C. puteana	1	alnus	AL1.3_6	0.4999	0.4464	4.77	10.7021	5.93214
C. puteana	3	alnus	AL3_7	0.7568	0.6142	4.77	18.8425	14.0725
C. puteana	1	alnus	AL1.1_8	0.6008	0.5556	4.77	7.5233	2.7533
C. puteana	3	alnus	AL3_9	0.7761	0.5786	4.77	25.4478	20.6778
C. puteana	3	alnus	AL3.1_10	0.5276	0.4001	4.77	24.166	19.396
C. puteana	2	alnus	AL2.1_11	0.5095	0.3213	4.77	36.9382	32.1682
C. puteana	2	alnus	AL2.1__12	0.5922	0.5639	4.77	4.77879	0.00879095
C. puteana	2	alnus	AL2.1_13	0.6474	0.4874	4.77	24.7142	19.9442
C. puteana	3	alnus	AL3_14	0.7973	0.6865	4.77	13.8969	9.1269
C. puteana	3	alnus	AL3_15	0.7637	0.6058	4.77	20.6757	15.9057
C. puteana	1	tascate	T14_1	0.8357	0.7908	0.73	5.37274	4.64274
C. puteana	2	tascate	T21_3	0.7502	0.69	0.73	8.02453	7.29453
C. puteana	3	tascate	T33_4	1.0542	1.009	0.73	4.28761	3.55761
C. puteana	3	tascate	T34_5	0.9861	0.8999	0.73	8.74151	8.01151
C. puteana	3	tascate	T33_6	0.8448	0.81	0.73	4.11932	3.38932
C. puteana	3	tascate	T34_9	0.8449	0.8377	0.73	0.852172	0.122172
C. puteana	3	tascate	T34_10	0.734	0.699	0.73	4.76839	4.03839
C. puteana	3	tascate	T34_11	0.8306	0.8069	0.73	2.85336	2.12336
C. puteana	2	tascate	T22_12	0.6695	0.629	0.73	6.04929	5.31929
C. puteana	1	tascate	T15_13	0.6625	0.6101	0.73	7.90943	7.17943
C. puteana	1	tascate	T14_14	0.6753	0.603	0.73	10.7064	9.97635
C. puteana	1	tascate	T15_15	0.6639	0.6131	0.73	7.65175	6.92175
C. puteana	1	tascate	T15_17	0.6802	0.614	0.73	9.73243	9.00243
C. puteana	1	tascate	T15_19	0.6687	0.6011	0.73	10.1092	9.37917
C. puteana	1	tascate	T15_20	0.8112	0.7317	0.73	9.8003	9.0703
C. puteana	1	strobiformis	A14_1	0.5262	0.5068	1.12	3.68681	2.56681
C. puteana	2	strobiformis	A21_2	0.7765	0.7178	1.12	7.55956	6.43956
C. puteana	1	strobiformis	A11_3	0.5948	0.5123	1.12	13.8702	12.7502
C. puteana	1	strobiformis	A11_4	0.6354	0.6012	1.12	5.38244	4.26244
C. puteana	2	strobiformis	A24__5	0.8194	0.7953	1.12	2.94118	1.82118
C. puteana	1	strobiformis	A14_6	0.5157	0.4712	1.12	8.62905	7.50905
C. puteana	1	strobiformis	A14_7	0.5927	0.5552	1.12	6.32698	5.20698
C. puteana	1	strobiformis	A14_8	0.5786	0.5502	1.12	4.9084	3.7884
C. puteana	1	strobiformis	A14_9	0.5454	0.5028	1.12	7.81078	6.69078
C. puteana	1	strobiformis	A11_10	0.6038	0.5412	1.12	10.3677	9.24767
C. puteana	2	strobiformis	A24_11	0.8488	0.7778	1.12	8.36475	7.24475
C. puteana	2	strobiformis	A24_12	0.7433	0.6827	1.12	8.15283	7.03283
C. puteana	2	strobiformis	A24_13	0.7394	0.673	1.12	8.98025	7.86025
C. puteana	1	strobiformis	A24_14	0.7559	0.727	1.12	3.82326	2.70326
C. puteana	3	strobiformis	A14_15	0.6509	0.5708	1.12	12.306	11.186
C. puteana	3	durangensis	D33_1	0.7385	0.6597	2.8	10.6703	7.87028
C. puteana	3	durangensis	D32_2	0.6938	0.6094	2.8	12.1649	9.36489
C. puteana	1	durangensis	D14_3	0.6269	0.5418	2.8	13.5747	10.7747
C. puteana	1	durangensis	D11_4	0.6497	0.5745	2.8	11.5746	8.77457
C. puteana	3	durangensis	D32_5	0.8209	0.7391	2.8	9.96467	7.16467
C. puteana	2	durangensis	D24_6	0.6265	0.5633	2.8	10.0878	7.28779
C. puteana	1	durangensis	D11_7	0.6501	0.5906	2.8	9.15244	6.35244
C. puteana	2	durangensis	D22_8	0.7256	0.6584	2.8	9.2613	6.4613
C. puteana	1	durangensis	D14_9	0.6616	0.6427	2.8	2.85671	0.056711
C. puteana	1	durangensis	D11_10	0.6833	0.6103	2.8	10.6834	7.88345
C. puteana	1	durangensis	D11_11	0.7336	0.7009	2.8	4.45747	1.65747
C. puteana	1	durangensis	D14_12	0.6297	0.6089	2.8	3.30316	0.50316
C. puteana	3	durangensis	D32_13	0.6295	0.6101	2.8	3.08181	0.281811
C. puteana	1	durangensis	D11_14	0.6834	0.627	2.8	8.25285	5.45285
C. puteana	1	durangensis	D14_15	0.6742	0.627	2.8	7.00089	4.20089
C. puteana	1	cooperi	C14_1	0.6407	0.4939	1.18	22.9124	21.7324
C. puteana	1	cooperi	C14_2	0.6425	0.5011	1.18	22.0078	20.8278
C. puteana	1	cooperi	C14_3	0.654	0.5523	1.18	15.5505	14.3705
C. puteana	2	cooperi	C22_4	0.7485	0.6449	1.18	13.841	12.661
C. puteana	1	cooperi	C14_5	0.7955	0.726	1.18	8.73664	7.55664
C. puteana	1	cooperi	C14_6	0.6535	0.6331	1.18	3.12165	1.94165
C. puteana	2	cooperi	C22_7	0.8419	0.6432	1.18	23.6014	22.4214
C. puteana	2	cooperi	C24_8	0.9043	0.5862	1.18	35.1764	33.9964
C. puteana	3	cooperi	C31_9	0.7189	0.6434	1.18	10.5022	9.32216
C. puteana	3	cooperi	C31_10	0.7293	0.6109	1.18	16.2347	15.0547
C. puteana	2	cooperi	C24_11	0.8255	0.7799	1.18	5.52392	4.34392
C. puteana	1	cooperi	C14_12	0.7059	0.6018	1.18	14.7471	13.5671
C. puteana	2	cooperi	C22_13	0.8963	0.7832	1.18	12.6185	11.4385
C. puteana	3	cooperi	C31_14	0.8008	0.6967	1.18	12.9995	11.8195
C. puteana	1	cooperi	C12_15	0.7949	0.6746	1.18	15.134	13.954
C. puteana	1	F. silvatica	F2	1.0983	0.567	2.31	48.3748	46.0648
C. puteana	1	F. silvatica	F3	1.0579	0.5678	2.31	46.3276	44.0176
C. puteana	1	F. silvatica	F6	1.3106	0.4567	2.31	65.1534	62.8434
C. puteana	1	F. silvatica	F7	1.0713	0.5987	2.31	44.1146	41.8046
C. puteana	1	F. silvatica	F8	1.0157	0.567	2.31	44.1764	41.8664
C. puteana	1	F. silvatica	F9	1.0559	0.8383	2.31	20.608	18.298
C. puteana	1	F. silvatica	F10	1.2441	1.0197	2.31	18.0371	15.7271
C. puteana	1	F. silvatica	F15	1.1163	0.8818	2.31	21.0069	18.6969
C. puteana	1	F. silvatica	F19	1.1687	0.4618	2.31	60.486	58.176
C. puteana	1	F. silvatica	F20	1.0113	0.789	2.31	21.9816	19.6716
C. puteana	1	F. silvatica	F26	0.9886	0.6533	2.31	33.9166	31.6066
C. puteana	1	F. silvatica	F27	1.0139	0.7998	2.31	21.1165	18.8065
C. puteana	1	F. silvatica	F28	1.0087	0.731	2.31	27.5305	25.2205
C. puteana	1	F. silvatica	F32	1.1687	0.827	2.31	29.2376	26.9276
C. puteana	1	F. silvatica	F33	1.1093	0.799	2.31	27.9726	25.6626
C. puteana	1	F. silvatica	F34	0.8385	0.525	2.31	37.3882	35.0782

## Sheet: Trametes versicolor
fungi_species	tree_number	wood_species	sample_number	start_dry_weight	end_dry_weight	% leaching	mass_loss%	mass_loss_with_lixiviation
T. versicolor	1	encino	e14-16	1.0188	0.7329	1.3	28.0624	26.7624
T. versicolor	2	encino	e25-17	1.2919	0.8685	1.3	32.7734	31.4734
T. versicolor	3	encino	e32-18	1.3447	0.8932	1.3	33.5763	32.2763
T. versicolor	2	encino	e24-19	1.3958	1.098	1.3	21.3354	20.0354
T. versicolor	1	encino	e14-20	1.2863	0.9497	1.3	26.1681	24.8681
T. versicolor	2	encino	e24-21	1.2063	0.901	1.3	25.3088	24.0088
T. versicolor	2	encino	e24-22	1.4165	1.0661	1.3	24.737	23.437
T. versicolor	1	encino	e13-23	1.1742	0.9333	1.3	20.5161	19.2161
T. versicolor	2	encino	e25-24	1.5644	1.0311	1.3	34.0897	32.7897
T. versicolor	3	encino	e31-25	1.5792	1.1407	1.3	27.7672	26.4672
T. versicolor	3	encino	e32-26	1.2838	0.9182	1.3	28.478	27.178
T. versicolor	1	encino	e14-27	1.3722	0.8081	1.3	41.1092	39.8092
T. versicolor	1	encino	e13-28	1.2357	1.0027	1.3	18.8557	17.5557
T. versicolor	3	encino	e32-29	1.5677	1.0978	1.3	29.9738	28.6738
T. versicolor	1	encino	e14-30	1.3501	1.0825	1.3	19.8208	18.5208
T. versicolor	1	alnus	al1.1-16	0.7053	0.5114	3.1	27.4918	24.3918
T. versicolor	3	alnus	al3-17	0.8091	0.4238	3.1	47.6208	44.5208
T. versicolor	2	alnus	al2.1-18	0.5866	0.2674	3.1	54.4153	51.3153
T. versicolor	3	alnus	al3-19	0.7324	0.2278	3.1	68.8968	65.7968
T. versicolor	3	alnus	al3-20	0.8338	0.5025	3.1	39.7337	36.6337
T. versicolor	1	alnus	al1.1-21	0.6211	0.1201	3.1	80.6633	77.5633
T. versicolor	1	alnus	al1.1-22	0.6783	0.5193	3.1	23.441	20.341
T. versicolor	2	alnus	al2.1-23	0.4223	0.3986	3.1	5.61212	2.51212
T. versicolor	1	alnus	al1.1-24	0.7039	0.5505	3.1	21.7929	18.6929
T. versicolor	3	alnus	al3-25	0.6279	0.5039	3.1	19.7484	16.6484
T. versicolor	2	alnus	al2.1-26	0.4767	0.3079	3.1	35.4101	32.3101
T. versicolor	2	alnus	al2.1-27	0.5437	0.2604	3.1	52.1059	49.0059
T. versicolor	3	alnus	al3-28	0.8332	0.6561	3.1	21.2554	18.1554
T. versicolor	2	alnus	al2.1-29	0.5391	0.3497	3.1	35.1326	32.0326
T. versicolor	1	alnus	al1.1-30	0.6402	0.3471	3.1	45.7826	42.6826
T. versicolor	1	tascate	t15-16	0.6868	0.6657	3	3.07222	0.072219
T. versicolor	1	tascate	t14-17	0.7391	0.7011	3	5.14139	2.14139
T. versicolor	3	tascate	t34-18	0.8768	0.8501	3	3.04516	0.0451642
T. versicolor	3	tascate	t34-19	0.8171	0.7899	3	3.32885	0.328846
T. versicolor	3	tascate	t35-20	0.7414	0.7108	3	4.12733	1.12733
T. versicolor	3	tascate	t34-21	0.8944	0.8454	3	5.47853	2.47853
T. versicolor	3	tascate	t32-22	0.6464	0.485	3	24.9691	21.9691
T. versicolor	3	tascate	t35-23	0.778	0.708	3	8.99743	5.99743
T. versicolor	3	tascate	t35-24	0.8477	0.8101	3	4.43553	1.43553
T. versicolor	2	tascate	t24-25	0.8133	0.7789	3	4.22968	1.22968
T. versicolor	1	tascate	t15-26	0.6657	0.6077	3	8.71263	5.71263
T. versicolor	2	tascate	t24-27	0.7431	0.7009	3	5.67891	2.67891
T. versicolor	1	tascate	t14-28	0.8146	0.7899	3	3.03216	0.032163
T. versicolor	2	tascate	t24-29	0.7715	0.7467	3	3.21452	0.214517
T. versicolor	3	tascate	t35-30	0.8364	0.7161	3	14.3831	11.3831
T. versicolor	1	strobiformis	a11-16	0.7485	0.711	2.5	5.01002	2.51002
T. versicolor	1	strobiformis	a34-17	0.669	0.5012	2.5	25.0822	22.5822
T. versicolor	2	strobiformis	a24-18	0.7553	0.5555	2.5	26.4531	23.9531
T. versicolor	1	strobiformis	a11-19	0.6834	0.6477	2.5	5.22388	2.72388
T. versicolor	3	strobiformis	a34-20	0.7626	0.7404	2.5	2.91109	0.411094
T. versicolor	2	strobiformis	a21-21	0.5402	0.4022	2.5	25.5461	23.0461
T. versicolor	2	strobiformis	a24-22	0.823	0.8018	2.5	2.57594	0.0759417
T. versicolor	3	strobiformis	a33-23	1.0326	1.0029	2.5	2.87623	0.376235
T. versicolor	2	strobiformis	a24-24	0.7136	0.6878	2.5	3.61547	1.11547
T. versicolor	1	strobiformis	a14-25	0.6152	0.5998	2.5	2.50325	0.00325098
T. versicolor	1	strobiformis	a14-26	0.6014	0.4078	2.5	32.1916	29.6916
T. versicolor	3	strobiformis	a33-27	0.991	0.9298	2.5	6.17558	3.67558
T. versicolor	3	strobiformis	a32-28	0.629	0.611	2.5	2.86169	0.361685
T. versicolor	3	strobiformis	a34-29	0.6755	0.64	2.5	5.25537	2.75537
T. versicolor	1	strobiformis	a14-30	0.6287	0.6001	2.5	4.54907	2.04907
T. versicolor	3	durangensis	d32-16	0.7625	0.7252	2.4	4.8918	2.4918
T. versicolor	3	durangensis	d33-17	0.8063	0.7709	2.4	4.39043	1.99043
T. versicolor	2	durangensis	d24-18	0.716	0.6897	2.4	3.67318	1.27318
T. versicolor	1	durangensis	d11-19	0.7986	0.7509	2.4	5.97295	3.57295
T. versicolor	2	durangensis	d24-20	0.7727	0.7417	2.4	4.01191	1.61191
T. versicolor	1	durangensis	d14-21	0.6652	0.6452	2.4	3.00661	0.606615
T. versicolor	3	durangensis	d33-22	0.7604	0.7322	2.4	3.70857	1.30857
T. versicolor	1	durangensis	d14-23	0.6683	0.6514	2.4	2.5288	0.128804
T. versicolor	2	durangensis	d24-24	0.7644	0.7444	2.4	2.61643	0.216431
T. versicolor	3	durangensis	d33-25	0.3314	0.32	2.4	3.43995	1.03995
T. versicolor	3	durangensis	d32-26	0.6633	0.6367	2.4	4.01025	1.61025
T. versicolor	2	durangensis	d22-27	0.7194	0.699	2.4	2.8357	0.435696
T. versicolor	3	durangensis	d33-28	0.7298	0.7083	2.4	2.94601	0.546013
T. versicolor	1	durangensis	d14-29	0.6514	0.6307	2.4	3.17777	0.777771
T. versicolor	2	durangensis	d22-30	0.6874	0.6611	2.4	3.82601	1.42601
T. versicolor	3	cooperi	c32-16	0.5503	0.5279	0.74	4.07051	3.33051
T. versicolor	2	cooperi	c22-17	0.9348	0.9127	0.74	2.36414	1.62414
T. versicolor	2	cooperi	c24-18	0.7327	0.7114	0.74	2.90706	2.16706
T. versicolor	1	cooperi	c12-19	0.8131	0.8039	0.74	1.13147	0.391472
T. versicolor	1	cooperi	c13-20	0.7869	0.7753	0.74	1.47414	0.734139
T. versicolor	3	cooperi	c31-21	0.759	0.749	0.74	1.31752	0.577523
T. versicolor	2	cooperi	c22-22	0.7927	0.7513	0.74	5.22266	4.48266
T. versicolor	2	cooperi	c24-23	0.7849	0.587	0.74	25.2134	24.4734
T. versicolor	3	cooperi	c32-24	0.5764	0.567	0.74	1.63081	0.890812
T. versicolor	1	cooperi	c12-25	0.8639	0.8398	0.74	2.78967	2.04967
T. versicolor	1	cooperi	c13-26	0.7763	0.741	0.74	4.54721	3.80721
T. versicolor	2	cooperi	c22-27	0.8357	0.8147	0.74	2.51286	1.77286
T. versicolor	2	cooperi	c24-28	0.8198	0.8009	0.74	2.30544	1.56544
T. versicolor	3	cooperi	c31-29	0.7653	0.7244	0.74	5.34431	4.60431
T. versicolor	1	cooperi	c12-30	0.7957	0.7245	0.74	8.9481	8.2081
T. versicolor	1	F. silvatica	f1	1.1598	0.3644	1.94	68.5808	66.6408
T. versicolor	1	F. silvatica	f4	1.0113	0.9096	1.94	10.0564	8.11636
T. versicolor	1	F. silvatica	f5	1.0576	0.8369	1.94	20.868	18.928
T. versicolor	1	F. silvatica	f10	1.0744	0.2001	1.94	81.3757	79.4357
T. versicolor	1	F. silvatica	f11	1.6262	0.5265	1.94	67.6239	65.6839
T. versicolor	1	F. silvatica	f12	1.196	0.9287	1.94	22.3495	20.4095
T. versicolor	1	F. silvatica	f16	1.1141	0.5295	1.94	52.4728	50.5328
T. versicolor	1	F. silvatica	f17	1.0906	0.4238	1.94	61.1407	59.2007
T. versicolor	1	F. silvatica	f18	1.2459	1.0303	1.94	17.3048	15.3648
T. versicolor	1	F. silvatica	f23	0.9993	0.5033	1.94	49.6347	47.6947
T. versicolor	1	F. silvatica	f24	1.0884	0.8045	1.94	26.0842	24.1442
T. versicolor	1	F. silvatica	f25	1.1157	0.4779	1.94	57.1659	55.2259
T. versicolor	1	F. silvatica	f29	1.0819	1.0503	1.94	2.92079	0.980788
T. versicolor	1	F. silvatica	f30	1.216	0.9438	1.94	22.3849	20.4449
T. versicolor	1	F. silvatica	f31	1.2672	1.0208	1.94	19.4444	17.5044
T. versicolor	1	F. silvatica	f35	1.0312	0.3842	1.94	62.7424	60.8024
T. versicolor	1	F. silvatica	f36	1.092	0.3545	1.94	67.5366	65.5966
T. versicolor	1	F. silvatica	f37	1.0718	0.4159	1.94	61.1961	59.2561
